1           **A method for simultaneously monitoring phloem and xylem**  
2                           **reconnections in grafted watermelon seedlings**

3   Jianuo Xu<sup>1†</sup>, Xiaoyang Wei<sup>1,2†</sup>, Mu Xiong<sup>1</sup>, Ting Zhang<sup>1</sup>, Changjin Liu<sup>1</sup>, Zhilong Bie<sup>1</sup>,  
4   Yuan Huang<sup>1,3\*</sup>

5   <sup>1</sup>Key Laboratory of Horticultural Plant Biology, Ministry of Education/College of  
6   Horticulture and Forestry Sciences, Huazhong Agricultural University, Wuhan 430070,  
7   P.R. China

8   <sup>2</sup>Centre for Plant Science, School of Environmental and Life Sciences, The University  
9   of Newcastle, Callahan NSW 2308, Australia

10   <sup>3</sup>Agricultural Genomics Institute at Shenzhen, Chinese Academy of Agricultural  
11   Sciences, Shenzhen Branch, Guangdong Laboratory for Lingnan Modern Agriculture,  
12   Genome Analysis Laboratory of the Ministry of Agriculture, Guangdong, Shenzhen  
13   518000, P.R. China

14

15   <sup>†</sup>These authors contributed equally to this work.

16   \*Corresponding author. Tel: +86 27 87282010; Fax: +86 27 87282010

17   E-mail address: [huangyuan@mail.hzau.edu.cn](mailto:huangyuan@mail.hzau.edu.cn)

18

19

20

21

22

23

24

25 **Abstract**

26 Grafting is an effective way to increase watermelon tolerance to biotic and abiotic  
27 stresses. However, the survival of grafted seedlings largely depends on successful graft  
28 formation. Therefore, understanding the graft formation process, particularly the  
29 vascular reconnection process is of critical importance. This study found that lignin in  
30 watermelon stem shows strong auto-fluorescence under blue-light excitation which  
31 makes blue-light excited fluorescent tracers (FTs) such as 5(6)-carboxy fluorescein  
32 diacetate (CFDA) become unsuitable for assaying vascular connectivity in watermelon.  
33 In contrast, UV-light excited esculin and red-light excited acid fuchsin were proved to  
34 be efficient FTs for monitoring the phloem and xylem connectivity, respectively, in self-  
35 grafted watermelon. Furthermore, a combined application of esculin to the scion  
36 cotyledon and acid fuchsin to the rootstock root enabled simultaneous monitoring of  
37 the phloem and xylem connectivity in individual self-grafted watermelon seedlings. In  
38 addition, this method is also applicable in investigating the phloem and xylem  
39 reconnections in self-grafted melon and cucumber, and heterograft of watermelon,  
40 melon and cucumber onto pumpkin rootstock. Based on this established method, we  
41 found that phloem and xylem reconnections are not timely separated in self-grafted  
42 watermelon. Furthermore, low temperature and removal of the rootstock cotyledons  
43 both delayed the vascular reconnection process in watermelon. In conclusion, this new  
44 method provides a convenient, accurate and rapid way to analyze the vascular  
45 connectivity not only in watermelon, but also in other cucurbit crops.

46 **Key words:** Esculin; Acid fuchsin; Vascular reconnection; Watermelon; Cucurbit

47 species; Grafting

## 48 **1. Introduction**

49 Vegetable grafting is extensively used today in agricultural production to control  
50 soil-borne pathogens (Yetisir et al., 2003; Thies et al., 2016), tolerance to salinity (Yang  
51 et al., 2013), suboptimal temperatures (Li et al., 2014; Yang et al., 2016), and mineral  
52 deficiency (Nawaz et al., 2017). Commercial vegetable grafting is mainly practiced in  
53 Cucurbitaceae and Solanaceae species, among them watermelon has the highest  
54 grafting proportion, more than 40% of watermelon plants are grafted in China (Zhong  
55 et al., 2018). Although grafting plays a central role in successful production of  
56 vegetables, however, the survival of grafted seedlings largely depends on successful  
57 graft formation. Therefore, understanding the graft formation process, particularly the  
58 phloem and xylem reconnection process is of critical importance.

59 Fluorescent tracers (FT) with a range of spectral properties have been used to assay  
60 phloem and xylem connectivity in various plants (Yin et al., 2012; Melnyk et al., 2015;  
61 Jiang et al., 2019; Tsutsui et al., 2020; Cui et al., 2021; Miao et al., 2021; Deng et al.,  
62 2021). Generally, a FT is loaded into a cut in the target tissue and the sequential  
63 dispersion of the reporter into other parts of the plant demonstrates the phloem and/or  
64 xylem reconnection. 5(6)-carboxy fluorescein diacetate (CFDA) perhaps is the most  
65 widely used FT in the plant. CFDA is non-fluorescent but it could be converted into  
66 fluorescent carboxy fluorescein (CF) by intracellular esterases in live cells and then be  
67 loaded into vascular for long distant transport. By applying CFDA to the self-grafted  
68 *Arabidopsis*, Melnyk et al. (2015) successfully documented the reconnecting process

69 of vascular tissues and found that the phloem and xylem reconnections are temperately  
70 separated. However, resolution of current monitoring methods including the CFDA  
71 application applied by Melnyk et al. (2015) is limited. To our knowledge, current  
72 methods using FTs to assay the vascular connectivity are only able to conduct the  
73 phloem and xylem assays separately in the plant, making monitoring the phloem and  
74 xylem connectivity in individual plants impossible.

75 Furthermore, application of FT is often limited by endogenous autofluorescence in  
76 the plant, which is an ever-present roadblock for researchers to visualize specific  
77 fluorescent markers such as CFDA (Billinton and Knight, 2001; Donaldson, 2020).  
78 Common sources of this autofluorescence in the plant include flavins, NADH and  
79 NADPH, elastin and collagen, lipofuscins and lignin, and chlorophyll (Billinton and  
80 Knight, 2001). The presence of autofluorescence interferes with the FT which decreases  
81 contrast and clarity in fluorescence microscope visualization, and thus makes the FT  
82 application ineffective. In addition, autofluorescence spectra are generally broad. Hence,  
83 clarifying the autofluorescence source is important which provides the base for the  
84 selection of other applicable FTs.

85 Esculin and acid fuchsin are potential FTs to simultaneously monitor the phloem  
86 and xylem reconnections in grafted plants (Yin et al., 2012; Knoblauch et al., 2015;  
87 Miao et al., 2021; Deng et al., 2021). However, whether esculin is applicable in  
88 watermelon remains unknown. Esculin is a fluorescent coumarin glucoside which could  
89 be loaded into the phloem for long distance transport by the sucrose transporter AtSUC2  
90 in Arabidopsis (Knoblauch et al., 2015; Knox et al., 2018). However, the barley sucrose

91 transporter, HvSUT1, expressed in Arabidopsis failed to load esculin into the phloem  
92 (Knoblauch et al., 2015), putting a question mark on application of esculin in other  
93 species. Whereas, acid fuchsin has been used to monitor the xylem connectivity in  
94 Arabidopsis (Flaishman et al., 2008; Yin et al., 2012) and in cucumber (Miao et al.,  
95 2021). However, to our knowledge, acid fuchsin has only used as a mobile dye rather  
96 than being regarded as FT in these studies, making the application of this fluorescent  
97 molecule less sensitive.

98 In this study, we first elucidated that lignin in the watermelon stem shows strong  
99 autofluorescence under blue-light excitation, suggesting blue-light excited FTs such as  
100 CFDA is unsuitable for being used as FTs for assaying vascular connectivity in grafted  
101 watermelon. Base on this finding, we established that esculin and acid fuchsin are  
102 suitable for monitoring the phloem and xylem connectivity in grafted watermelon,  
103 respectively. Furthermore, a combined application method was developed in self-  
104 grafted watermelon seedlings to achieve the simultaneously monitoring of phloem and  
105 xylem reconnections in individual plants. Based on this method, we confirmed that  
106 effects of temperature and rootstock cotyledon on vascular reconnection in grafted  
107 watermelon are significant. The method introduced in this study provides an accurate,  
108 continent and inexpensive way to analyze the vascular connectivity in grafted  
109 watermelon.

## 110 **2. Materials and methods**

### 111 *2.1. Plant material and cultivation*

112 The experiment was conducted in plant growth room at the National Center of

113 Vegetable Improvement in Huazhong Agricultural University, Central China (latitude,  
114 30° 27' N; longitude, 114° 20' E). Watermelon cultivar 97103 (*Citrullus lanatus*, Beijing  
115 Vegetable Research Center, Beijing Academy of Agriculture and Forestry Sciences,  
116 China), melon cultivar Akekekouqi (*Cucumis melo*, Hami Melon Research Center,  
117 Xinjiang Academy of Agricultural Sciences, China), cucumber cultivar Jinyou35  
118 (*Cucumis sativus*, Cucumber Research Institute of Tianjin Kernel Agricultural Science  
119 and Technology Company Limited, China), and interspecific pumpkin hybrid cultivar  
120 Qingyanzhen No.1 (*C. maxima* × *C. moschata*, Qingdao Academy of Agricultural  
121 Sciences) were used as the plant materials in this study. Seeds were sterilized for 15  
122 min with 0.1% KMnO<sub>4</sub> and soaked in water at 55 °C for 20 min. Then, seeds were  
123 transferred onto wet filter papers and cultured in petri dishes at 30 °C in darkness for  
124 36 h. Germinated seeds were then sown in 72- cell plug tray (540 mm × 280 mm) in  
125 mixed media (peat: perlite: vermiculite, 7:3:1, volume ratio), and grown in the plant  
126 growth room. During the cultivation, a standard growth condition was maintained with  
127 150 μmol·m<sup>-2</sup>·s<sup>-1</sup> of photosynthetic photon flux density (PPFD), 14/10 h photoperiod,  
128 day/night temperature at 28°C/18°C, relative humidity at 65-85%.

## 129 2.2. Grafting and healing

130 In grafting, 11- and 8-day-old watermelon seedlings were used as the rootstock  
131 and the scion, respectively. One cotyledon grafting was performed as described by  
132 Hassell et al. (2008). Six graft combinations were used in this study including self-  
133 grafted watermelon, melon and cucumber, and three heterograft combinations that were  
134 watermelon, melon and cucumber grafted onto pumpkin, respectively. For rootstock

135 cotyledon removal experiment, splice grafting was conducted as described by Devi et  
136 al. (2021). The plants were placed in the healing chamber after grafting and this day  
137 was defined as 0 day after grafting (DAG).

138 The healing conditions were: from 0 to 1 DAG, maintained in dark; from 1 to 6  
139 DAG, grown under low light condition ( $50 \mu\text{mol}\cdot\text{m}^{-2}\cdot\text{s}^{-1}$ , 14/10 h photoperiod); from 7  
140 to 9 DAG, normal light condition ( $150 \mu\text{mol}\cdot\text{m}^{-2}\cdot\text{s}^{-1}$ , 14/10 h photoperiod). The day and  
141 night temperatures in healing chamber were  $26^{\circ}\text{C}$ . The humidity was kept above 95%  
142 during the first 5 days (0 to 4 DAG), then decreased to about 75% and maintained at a  
143 period from 5 to 9 DAG. At 10 DAG, plants were transferred from the healing chambers  
144 to the growth room and grown under standard condition as described in section 2.1.

### 145 *2.3. Paraffin sectioning, staining and confocal imaging of watermelon graft junction*

146 Graft junctions were sampled from self-grafted watermelon seedlings at 6 DAG.  
147 To label lignified tissues in stem sections, samples were stained with 1% (w/v) safranin  
148 for 2 h. After staining, samples were mounted in 50% glycerol and imaged using a  
149 confocal laser scanning microscope (Leica SP8, Leica, Germany). For safranin,  
150 fluorescence was detected at 552 nm excitation, 560-650 nm emission wavelength; for  
151 auto-fluorescence, fluorescence was detected at 488 nm excitation, 490-530 nm  
152 emission wavelength.

### 153 *2.4. Phloem and xylem connectivity assays simultaneously*

154 Phloem and xylem connectivity were measured simultaneously using the same  
155 plant by esculin (E8250, Sigma-Aldrich) and acid fuchsin (F8129, Sigma-Aldrich)  
156 movement across the graft junction, respectively. The value was presented as

157 (reconnected plants/total plants)  $\times$  100%. Before the esculin and acid fuchsin  
158 applications, the adaxial surface of the scion cotyledon was rubbed gently with  
159 sandpaper to remove the wax, whereas the root was cut off to 3-5 cm long. Afterwards,  
160 2% (w/v) esculin dissolved in 60% (v/v) acetonitrile together with 2.5 mM ethylene  
161 diamine tetra-acetic acid (EDTA) were applied to the scion cotyledon to measure  
162 phloem connectivity. Simultaneously, 0.5% (w/v) acid fuchsin was applied to the root  
163 to measure xylem connectivity, using the same plant for phloem connectivity  
164 measurement. Grafted seedlings were then kept in dark at room temperature for 2 h.  
165 Stem sections from the scion or rootstock 0.5 cm above or below the graft junction,  
166 respectively, were sampled for fluorescence assay. For esculin, a standard filter set for  
167 UV was applied which includes a 360/40 nm excitation filter and a 420 LP barrier filter.  
168 For acid fuchsin, a standard filter set for DSRed was applied which includes a 545/30  
169 nm excitation filter and a 620/60 nm barrier filter.

### 170 *2.5. Splice grafting treatment*

171 The self-grafted watermelon seedlings were used as materials. There were two  
172 treatments in this experiment, i.e., (1) one cotyledon grafting with one rootstock  
173 cotyledon, (2) splice grafting without rootstock cotyledon. Phloem and xylem  
174 reconnections were measured at day 3, 6 and 9 DAG.

### 175 *2.6. Suboptimal low temperature treatment*

176 The self-grafted watermelon seedlings were used as materials, grafted plants were  
177 healed at 26°C or 18°C (suboptimal low temperature), the other conditions were the  
178 same as described in above 2.2. Phloem and xylem reconnection were measured at day



179 3, 6 and 9 DAG.

## 180 2.7. Statistical analysis

181 Statistical analysis was performed using SPSS 25.0 software (SPSS Inc., Chicago,  
182 IL, USA). The data were presented as means  $\pm$  SE of three replicates. Each replicate  
183 had 20 plants. Student's t-test was conducted to show the difference of phloem and  
184 xylem reconnections between 26°C and 18°C healing conditions, and between one  
185 cotyledon grafted and splice grafted plants. Levels of significance were represented by  
186 \*\* $p < 0.01$  or \*\*\* $p < 0.001$ .

## 187 3. Results

### 188 3.1. Lignin in watermelon stem tissues showed strong green auto-fluorescence under 189 the blue-light excitation

190 By observing stem cross sections of watermelon stems using a fluorescence  
191 stereomicroscope, we found that watermelon stem showed strong green auto-  
192 fluorescence under blue-light excitation (a standard filter set for GFP viewing) (Figure  
193 1A-C). Hence, to clarify the source of this green autofluorescence in watermelon, we  
194 then performed safranin staining on stem sections. Safranin is a fluorescent dye  
195 commonly used for labelling lignified tissue in plants (Bond et al., 2008). As shown in  
196 Figure 1 D-G, the green auto-fluorescence in watermelon stem co-localized with the  
197 safranin stained lignified tissues including the xylem and the stem bark, indicating the  
198 green auto-fluorescence source was lignin. In addition, from our observation, other  
199 agricultural cucurbits crops including melon and pumpkin stems also showed strong  
200 autofluorescence under blue-light excitation (Supplemental Figure S1).

201

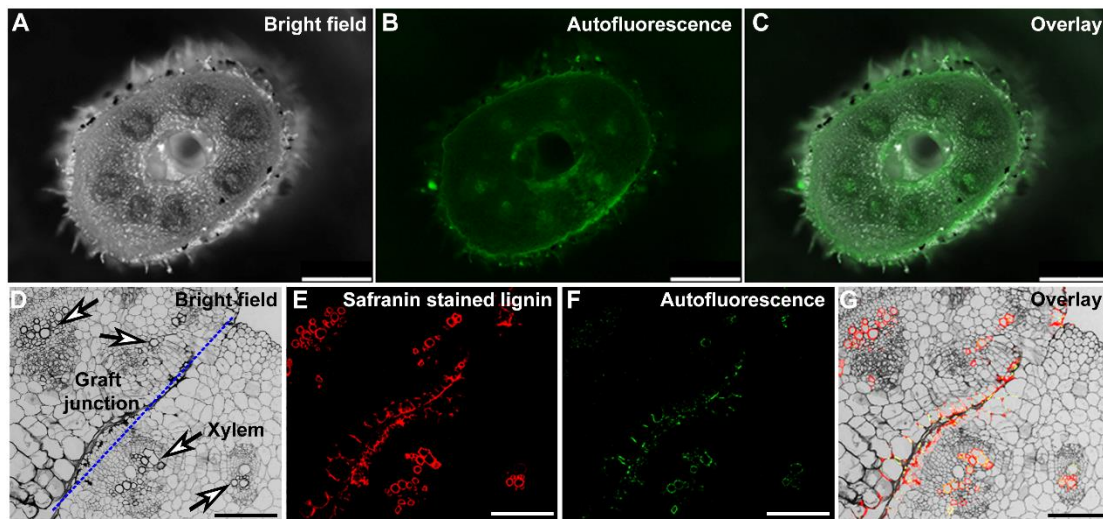

202

203 **Figure 1. Watermelon stem shows strong lignin induced auto-fluorescence under blue light**  
204 **excitation.** The hand-cutting stem sections of 10-day-old watermelon seedlings were imaged and  
205 showed strong auto-fluorescence when being excited by the laser for GFP detection. (A-G) Images  
206 of a cross section of watermelon stem viewed by a fluorescence stereomicroscope, (A) Bright field;  
207 (B) Auto-fluorescence under blue-light excitation; (C) Overlay image of (A) and (B); (D-G) Images  
208 of a paraffin cross section of watermelon graft junction viewed by a confocal microscope, (D) Bright  
209 field; (E) Lignin staining with safranin; (F) Auto-fluorescence of the graft junction under blue-light  
210 excitation; (G) Overlay image of (D-F). Dash line indicates graft junction. Arrows indicate xylem  
211 tissues. Bar in (A-C): 1 mm; bar in (D-G): 0.2 mm.

212

213 *3.2. A modified technique using mobile FTs to simultaneously monitor phloem and*  
214 *xylem connectivity in grafted watermelon seedlings*

215 To avoid noise from the lignin auto-fluorescence in watermelon stem, we selected  
216 two fluorescent molecules esculin and acid fuchsin that are not excited by blue-light  
217 and tested their application in watermelon. The absorbance/emission wavelengths for  
218 esculin and acid fuchsin are 367/454 nm and 540/630 nm (Supplemental Table S1),  
219 respectively. Thus, theoretically, fluorescent signals of these two fluorescent molecules  
220 would not be interfered by tissue auto-fluorescence in watermelon stem, nor have  
221 interference with each other. Indeed, under the stereomicroscope used in this study,

222 esculin and acid fuchsin were excited only by the UV-light and the red-light,  
223 respectively. In addition, watermelon stem did not show discernible auto-fluorescence  
224 under UV-light (for esculin excitation) nor red-light (for acid fuchsin excitation)  
225 excitations. Hence, we reasoned that esculin and acid fuchsin might be suitable to be  
226 used as FTs in watermelon. Furthermore, applying esculin and acid fuchsin to an  
227 individual grafted seedling at the same time might be able to simultaneously monitor  
228 the phloem and xylem connectivity in the plant.

229       Therefore, to test the applicability of esculin in watermelon, and to further test the  
230 possibility of achieving a simultaneously monitoring of the phloem and xylem  
231 connectivity in grafted watermelon, a combined application with esculin and acid  
232 fuchsin was applied in survived watermelon seedlings at 12 DAG. As shown in Figure  
233 2A, 2% (w/v) esculin and 0.5% (w/v) acid fuchsin were applied to the scion cotyledon  
234 and the rootstock root of survived grafted watermelon seedlings, respectively. Cross  
235 sections of the scion and the rootstock stems 0.5 cm away from the graft junction were  
236 sampled 2 h after the treatment and the fluorescent signals were detected using a  
237 fluorescent stereomicroscope. As shown in Figure 2, esculin applied onto the scion  
238 cotyledon had been loaded into the scion phloem (Figure 2B) and then been transported  
239 to the rootstock (Figure 2D) through the graft junction via reconnected phloem.  
240 Meanwhile, acid fuchsin fed to the rootstock root had been loaded into the rootstock  
241 xylem (Figure 2E) and transported to the scion (Figure 2C) through the reconnected  
242 xylem. Together, esculin and acid fuchsin could be applied as FTs to monitor the phloem  
243 and xylem connectivity in grafted watermelon.

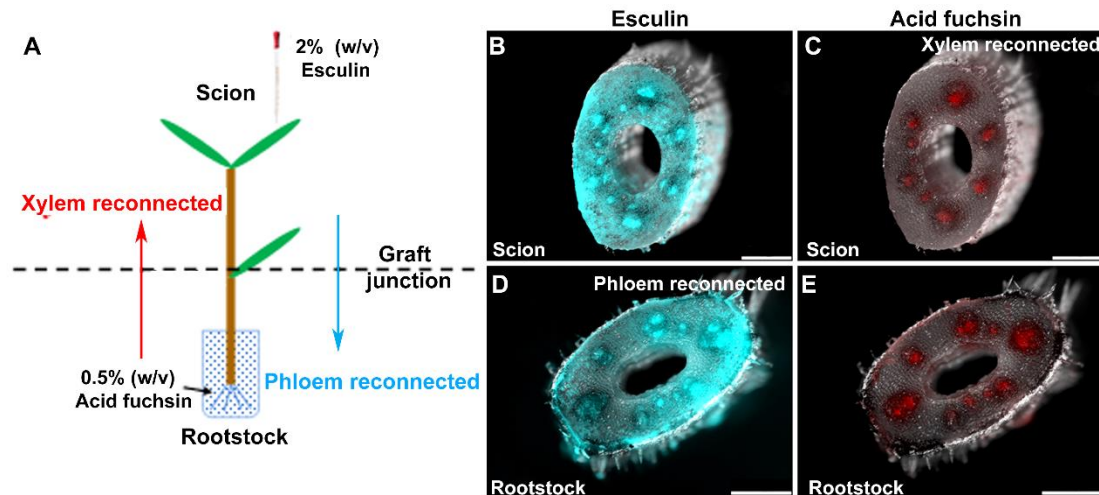

244

245 **Figure 2. Application of esculin and acid fuchsin in simultaneously monitoring the phloem and**  
246 **xylem connectivity in grafted watermelon.** Survived grafted watermelon seedlings at 12 DAG  
247 were used in this test. Fluorescent molecules esculin and acid fuchsin were applied to scion  
248 cotyledon and rootstock root, respectively, to test their application in monitoring the phloem and  
249 xylem connectivity in grafted watermelon. (A) A schematic diagram illustrates the esculin and acid  
250 fuchsin treatments to grafted watermelon, as well as their transport route in the plant. (B) Esculin  
251 detected in the scion stem. (C) Acid fuchsin detected in the scion stem. (D) Esculin detected in the  
252 rootstock stem; (E) Acid fuchsin detected in the rootstock stem. Arrows in (A) indicate transport  
253 directions: blue, esculin from scion to rootstock; red, acid fuchsin from rootstock to scion. Bar: 1  
254 mm.

255 Furthermore, the mobility of esculin and acid fuchsin in phloem and xylem,  
256 respectively, are comparable to one another. As described above, after 2 h, exogenously  
257 applied esculin and acid fuchsin both had been transported through the grafted junction  
258 to their targeted sink tissues, respectively (Figure 2). Most importantly, as shown in  
259 Figure 2, fluorescence of these two molecules in the same watermelon stem showed no  
260 interference with each other. This esculin/acid fuchsin combined application is able to  
261 achieve a simultaneously monitor of the phloem and xylem reconnections in grafted  
262 watermelon seedlings.

### 263 3.3. Vascular reconnection in self-grafted watermelon seedlings

264 To investigate the vascular reconnecting process in self-grafted watermelon, we

265 applied the combined esculin/acid-fuchsin. Phloem and xylem reconnections reached  
266 to 50% both at 5-6 DAG and to 100% both at 12-13 DAG (Figure 3A and B). In addition,  
267 during the reconnection process, phloem reconnection and xylem reconnection in  
268 individual seedlings occurred in a random order (Figure 3C). For instance, we observed  
269 four different types regarding phloem and xylem reconnections at 6 DAG, as indicated  
270 by the presences of esculin an acid fuchsin fluorescence in scion and rootstock stems,  
271 (i) Phloem and xylem both remain unconnected (Figure 4A-D, Supplemental Figure  
272 S2A-D); (ii) Phloem reconnected but xylem-unconnected (Figure 4E-H, Supplemental  
273 Figure S2E-H); (iii) Xylem reconnected but phloem un-connected (Figure 4I-L,  
274 Supplemental Figure S2I-L); (iv) Phloem and xylem both reconnected (Figure 4M-P,  
275 Supplemental Figure S2M-P). Statistical analysis demonstrated that, in 6 DAG grafted  
276 seedlings, around 32% seedlings only had reconnected phloem, 38% only had  
277 reconnected xylem, and 5% seedlings had both of the reconnected phloem and xylem  
278 (Figure 3C).

279

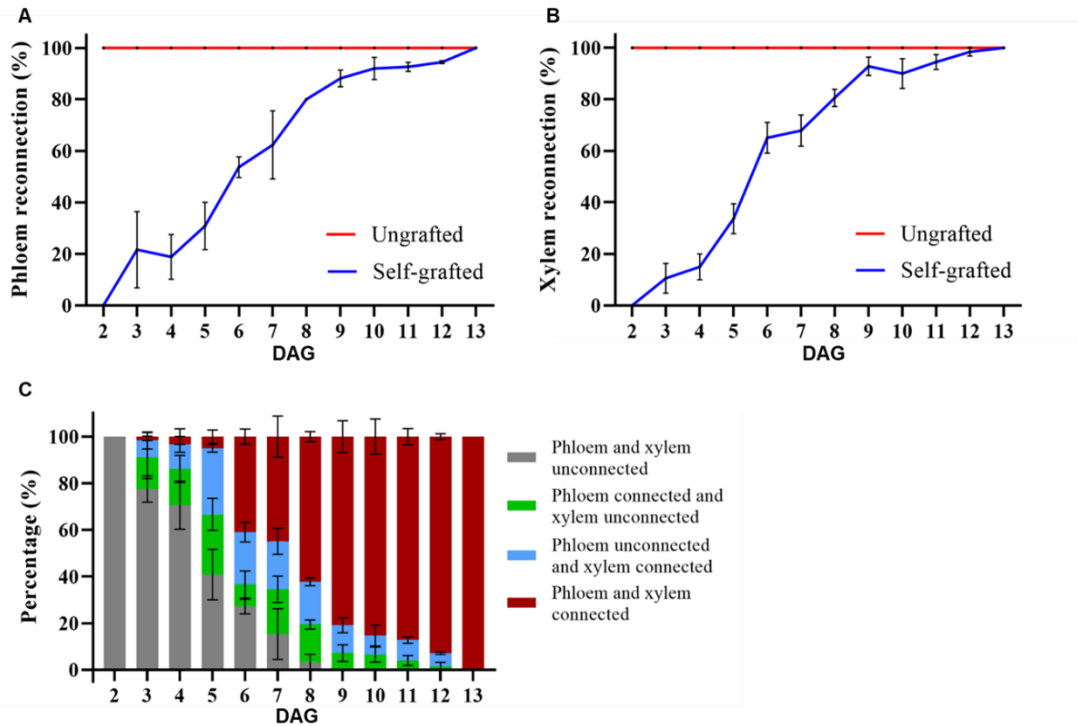

280

281 **Figure 3. Phloem and xylem reconnections are not timely separated in self-grafted watermelon.**

282 Un-grafted seedlings were used as positive control. (A) Phloem and (B) xylem reconnections in

283 grafted watermelon seedlings were similar to each other. (C) Percentage of four different vascular

284 reconnection types observed in self-grafted seedlings during graft formation. Data of each time point

285 was collected from three independent experiments with 20 seedlings per experiment. DAG: days

286 after grafting.

287

288

289

290

291

292

293

294

295

296

297

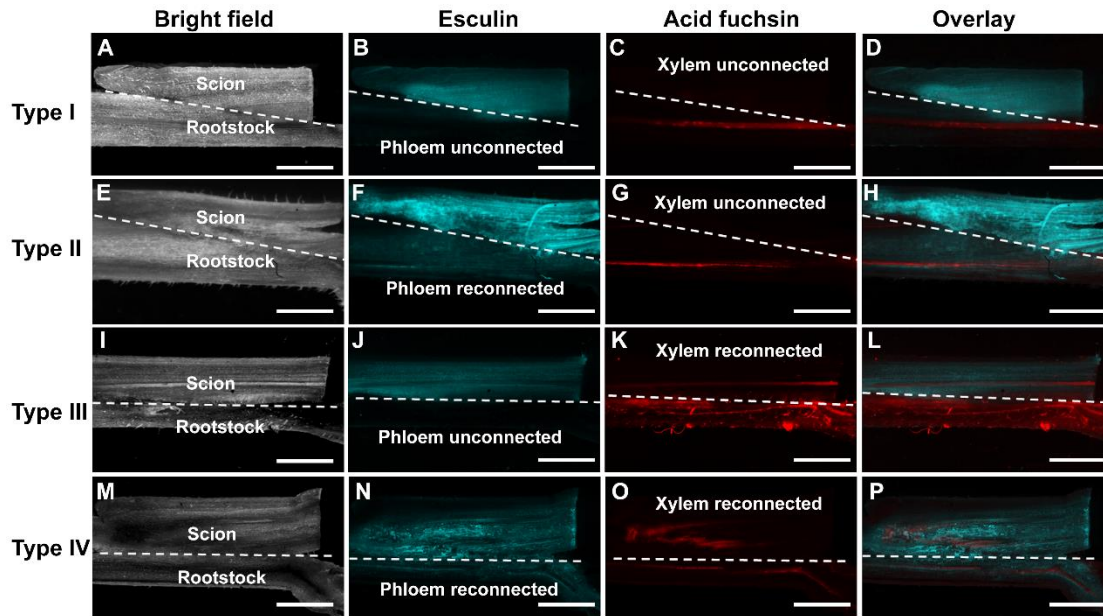

298

299 **Figure 4. Four different reconnection types in self-grafted watermelon seedlings at day 6 after**  
300 **grafting (longitudinal cutting).** To monitor phloem and xylem reconnections in grafted  
301 watermelon seedlings, fluorescent tracers including esculin and acid fuchsin were applied on the  
302 scion cotyledons and the rootstock roots, respectively. Stem sections from the scion and the  
303 rootstock of the same grafted seedlings were examined for the presences of esculin (Cyan) and acid  
304 fuchsin (Red) using fluorescent dissecting microscope. (A-D) Type I, grafted seedling with un-  
305 reconnected phloem and xylem. (E-H) Type II, grafted seedling with reconnected phloem and  
306 unconnected xylem. (I-L) Type III, grafted seedling with reconnected xylem and unconnected  
307 phloem. (M-P) Type IV, grafted seedling with reconnected phloem and xylem. Dash lines indicate  
308 graft junction. Bar: 2 mm.

309

310 *3.4. The developed method demonstrates the impact of temperature on the vascular*  
311 *reconnection in self-grafted watermelon seedlings*

312 Grafted watermelon seedlings were grown under 18 °C and 26 °C, respectively.

313 Phloem and xylem reconnections were measured at 3, 6, and 9 DAG grafted seedlings.

314 We observed that both of the phloem and xylem reconnections were significantly

315 delayed in seedlings grown under 18 °C compared to 26 °C (Figure 5). Under 26 °C,

316 reconnection rates of the phloem were 18% at 3 DAG, 58% at 6 DAG, and 80% at 9

317 DAG (Figure 5A). In contrast, under 18 °C, the phloem reconnection rates were 0% at  
318 3 DAG, 20% at 6 DAG, and 50% at 9 DAG (Figure 5A). For xylem reconnection, at 3,  
319 6, and 9 DAG, under 25°C, the rates were 18%, 61%, and 90%, respectively, whereas,  
320 under 18°C, the rates were decreased to 0%, 30%, and 61%, respectively. Together, this  
321 result confirms that low temperature delays vascular reconnection in watermelon  
322 grafted seedlings and in turn demonstrates that the combined application with esculin  
323 and acid fuchsin developed in this study is accurate and reliable.

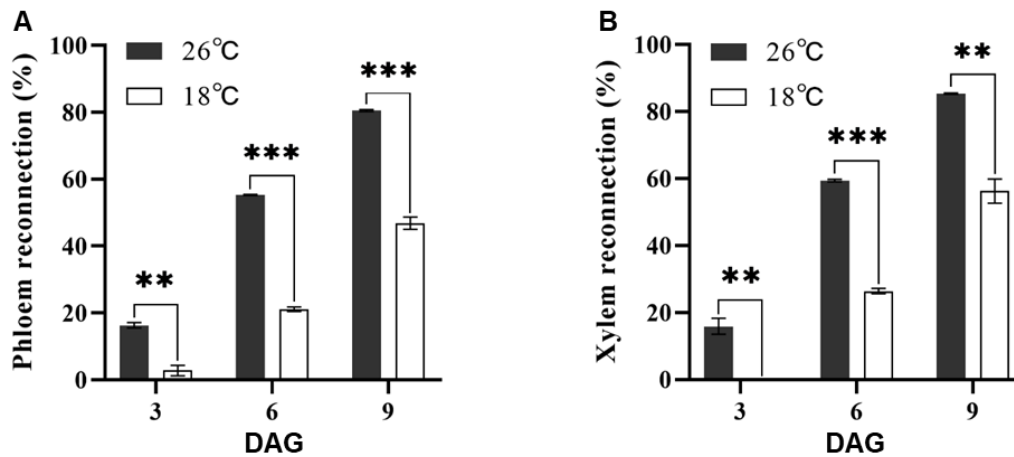

324  
325 **Figure 5. Suboptimal low temperature treatment delays both of the phloem and xylem**  
326 **reconnections in self-grafted watermelon seedlings.** (A) Phloem reconnection rates. (B) Xylem  
327 reconnection rates. Asterisks indicate significant difference between 18°C and 26°C at 3 DAG, 6  
328 DAG and 9 DAG, by Student's t-test (\*\*  $p < 0.01$ , \*\*\*  $p < 0.001$ ). DAG: days after grafting.

329

### 330 *3.5. Rootstock cotyledon is essential for the vascular reconnection in self-grafted* 331 *watermelon seedlings*

332 To investigate the impact of rootstock cotyledon on vascular reconnection in  
333 grafted watermelon, we performed splice-grafting in watermelon seedlings and  
334 analyzed the vascular reconnection process using the esculin/acid fuchsin combined  
335 application. Based on results shown in Figure 6, reconnection rates of phloem and



336 xylem both were significantly lower in splice-grafted seedlings at 3, 6, and 9 DAG in  
337 comparison with control seedlings that have one rootstock cotyledon.

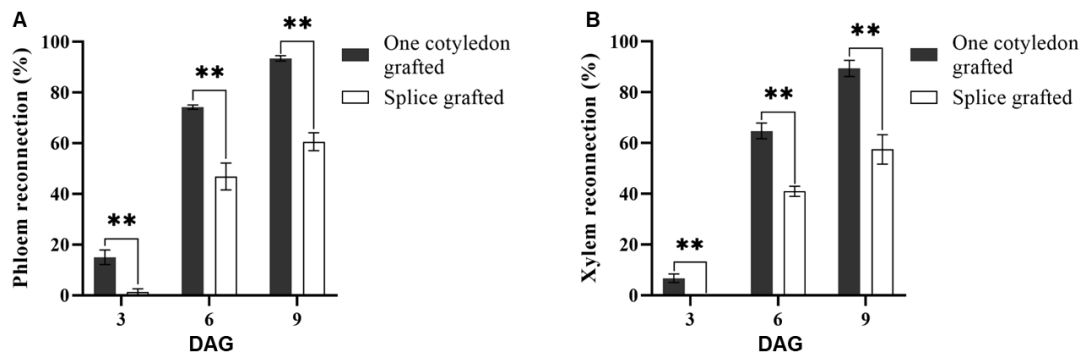

338

339 **Figure 6. Rootstock cotyledon is essential for the phloem and xylem reconnections in self-**  
340 **grafted watermelon seedlings.** (A) Phloem reconnection rate. (B) Xylem reconnection rate. One  
341 cotyledon grafted: grafted seedling with one rootstock cotyledon; Splice grafted: grafted seedling  
342 with no rootstock cotyledon. Asterisks indicate significant difference by Student's t-test (\*\*  $p <$   
343 0.01). DAG: days after grafting.

344 *3.6. Application of the esculin/acid fuchsin combined treatment in other cucurbit*  
345 *species*

346 To test general applicability of this method for monitoring the phloem and xylem  
347 connectivity in cucurbit species, we first applied the esculin/acid fuchsin combined  
348 application to self-grafted melon and cucumber seedlings. As shown in Figure 7, esculin  
349 applied to the scion cotyledons of self-grafted melon and cucumber was successfully  
350 loaded into the scion phloem (Figure 7B, H) and then transported into the rootstock  
351 (Figure 7E, K) through graft junctions of each species. Meanwhile, acid fuchsin fed to  
352 the rootstocks was detected in both of the scion and rootstock stems in self-grafted  
353 melon and cucumber seedlings (Figure 7C, F, I and L). Together, these results suggest  
354 that the esculin/acid fuchsin combined treatment is applicable in monitoring vascular  
355 connectivity in self-grafted melon and cucumber seedlings. Furthermore, we had also  
356 tested the applicability of this method in compatible heterograft combinations of

357 watermelon, melon and cucumber scions onto pumpkin rootstock. As expected, esculin  
358 and acid fuchsin both could be loaded into and transported in vascular of heterograft  
359 seedlings of all three combinations (Supplemental Figure S3). These observations  
360 indicated the general applicability of this method for monitoring vascular connectivity  
361 in self-grafted and heterograft seedlings in cucurbit species.

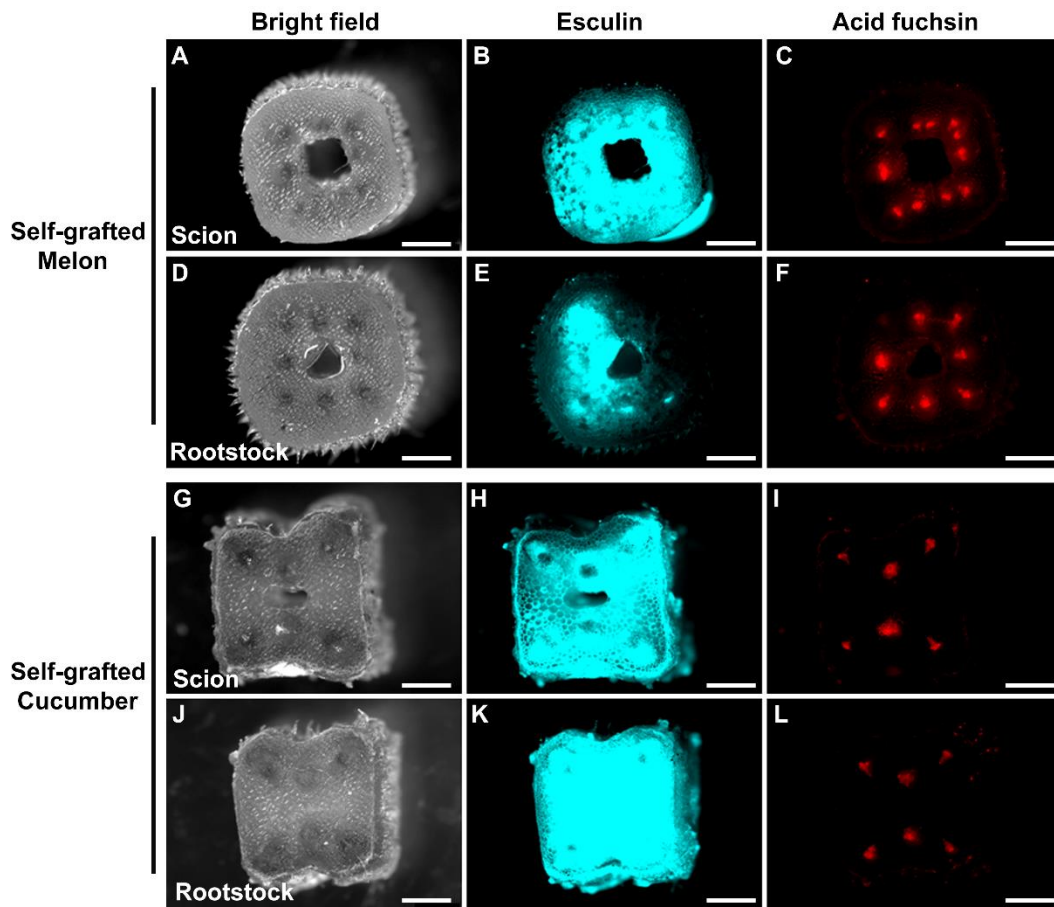

362  
363 **Figure 7. Application of esculin and acid fuchsin in self-grafted melon and cucumber seedlings.**  
364 Self-grafted melon and cucumber seedlings at day 12 after grafting (DAG) were used in this test.  
365 (A-F) Self-grafted melon stem sections. (G-L) Self-grafted cucumber stem sections. Esculin fed on  
366 the scion cotyledon was successfully loaded into the scion phloem in both of the self-grafted (B)  
367 melon and (H) cucumber seedlings, and then was transported into the rootstock in both of self-  
368 grafted (E) melon and (K) cucumber seedlings through the graft junctions. Acid fuchsin fed on the  
369 rootstock root was loaded into the rootstock xylem in both of the self-grafted (F) melon and (L)  
370 cucumber seedlings, and then was transported into the scion in both of self-grafted (C) melon and  
371 cucumber seedlings. Bar: 1 mm.

372

## 373 **4. Discussion**

### 374 *4.1. A combined application of esculin and acid fuchsin enabled simultaneous* 375 *monitoring of the phloem and xylem connectivity*

376 Fluorescent tracers (FTs), particularly carboxyfluorescein diacetate (CFDA), has  
377 been widely used to monitor symplastic transport through phloem and xylem in various  
378 plants (Oparka et al., 1994; Wright et al., 1996; Botha et al., 2008; Melnyk et al., 2015).  
379 However, its application is interfered by tissues autofluorescence in plants. In plants,  
380 one major green auto-fluorescent component (excitation at 488 nm) is lignin (Billinton  
381 and Knight, 2001; Donaldson, 2020). The peak absorbance/emission wavelengths of  
382 green lignin auto-fluorescence are 488/530 nm (Billinton and Knight, 2001; Donaldson,  
383 2020). Consequently, the green lignin auto-fluorescence would interfere with blue-  
384 light-excited FTs, making the fluorescent signal unreliable. Therefore, blue-light-  
385 excited FTs, such as CFDA (peak excitation: 494 nm; peak emission: 521 nm)  
386 (Supplemental Figure S4), are not suitable for being used to assay vascular connectivity  
387 in watermelon (Figure 1).

388 Cucurbits crops including watermelon, melon and pumpkin show strong  
389 autofluorescence under the blue-light excitation, making blue-light excited FTs  
390 inefficient in monitoring the vascular connectivity in these species (Figure 1;  
391 Supplemental Figure S1, S4). Hence, we have developed a convenient, accurate and  
392 inexpensive esculin/acid fuchsin combined application method for simultaneously  
393 monitoring vascular connectivity in grafted seedlings in major agricultural cucurbits  
394 crops. The method consists of two independent applications, applying esculin to scion

395 cotyledon to monitor phloem connectivity, meanwhile, applying acid fuchsin to  
396 rootstock root to determine xylem connectivity. Conventional monitoring methods used  
397 to apply only one type of FT such as CFDA to monitor the phloem or xylem  
398 connectivity in the plant (Melnyk et al., 2015; Jiang et al., 2019; Tsutsui et al., 2020;  
399 Cui et al., 2020; Miao et al., 2021; Yin et al., 2012; Deng et al., 2021). Consequently,  
400 the resolution of conventional methods in illustrating the vascular connectivity in  
401 individual plants is insufficient. This combined application of esculin and acid fuchsin  
402 in individual plants, however, is able to monitor the phloem and xylem connectivity in  
403 a single plant without the need to conduct the assays separately in two individuals,  
404 which greatly lower the workload and increases the depth of the determining method.  
405 The ability to analyze the phloem and xylem connectivity in individual plants enables  
406 the investigation of the vascular reconnection process at individual level in grafted  
407 plants, which makes the data more accurate. Furthermore, this method also provides a  
408 valid way to further investigate the vascular biology in the plant, particular to elucidate  
409 the development process of the phloem and xylem and their potential interactions  
410 during the process of graft formation in grafted plants. In addition, the success of this  
411 method in self-grafted watermelon, melon and cucumber seedlings and heterograft  
412 combinations of watermelon, melon and cucumber onto pumpkin demonstrates its  
413 general applicability in cucurbit crops.

414 *4.2. Phloem and xylem reconnections are not timely separated in self-grafted*  
415 *watermelon*

416 We used this method to analyze the vascular reconnection process in self-grafted

417 watermelon. A previous study by Melnyk et al. (2015) described in grafted Arabidopsis  
418 seedlings, phloem and xylem reconnections are temporally separated that phloem  
419 reconnection is prior to xylem reconnection. Generally, phloem reconnection reached  
420 to 50% at 3 DAG and to 100% at 4 DAG, whereas these time points for xylem  
421 reconnection were at 6 DAG and 7 DAG, respectively (Melnyk et al., 2015). Recent  
422 study in the heterograft of cucumber onto pumpkin (Miao et al., 2021), however,  
423 showed slightly different results that the phloem and xylem reconnections in the  
424 heterograft seedlings are not totally timely separated but the phloem reconnection peak  
425 occurs two days earlier compared to the xylem. However, our observation in self-  
426 grafted watermelon indicated that the phloem and xylem reconnections are not timely  
427 separated that they occur at the same time (Figure 3). Nevertheless, we also observed  
428 that the phloem and xylem reconnections occur randomly in individual plants (Figures  
429 3, 4), implying the mechanism regulating the vascular reconnection process is complex.  
430 This substantial difference might be due to difference in the plant species and grafting  
431 methods applied in different studies. For instance, we used one cotyledon grafting in  
432 watermelon, while Melnyk et al. (2015) used splice grafting without rootstock  
433 cotyledon in Arabidopsis. Besides, the limits of the monitoring method used in previous  
434 studies, which are only able to conduct the phloem and xylem connectivity assay in  
435 different seedlings, might cause evitable errors.

436 *4.3. Application of the developed method to demonstrate the effects of temperature and*  
437 *rootstock cotyledon on the vascular reconnection of grafted watermelon*

438 Previous study by Yang et al. (2016) indicated that low temperature inhibits

439 vascular reconnection in plants, and the survival rate of the splice grafting watermelon  
440 seedlings that have no rootstock cotyledon is significantly lower compared with  
441 seedlings that have at least one rootstock cotyledon (Dabirian et al., 2017; Devi et al.,  
442 2021). However, the effects of temperature and the rootstock cotyledon on the vascular  
443 reconnection remains unclear. Using the developed method, we found that low  
444 temperature and rootstock cotyledon removal significantly delays the reconnection of  
445 phloem and xylem, which strongly supports the phenomenon that low temperature and  
446 rootstock cotyledon removal results in lower graft survival and seedling growth (Yang  
447 et al., 2016; Dabirian et al., 2017; Devi et al., 2021).

## 448 **5. Conclusion**

449 We have demonstrated that blue-light excited FTs are not suitable for watermelon,  
450 melon and pumpkin in their vascular connectivity assays. The method developed in this  
451 study for monitoring the vascular connectivity in grafted plants using a combined  
452 application with esculin and acid fuchsin has overcome this obstacle in cucurbit crops.  
453 This rapid method was used to monitor the phloem and xylem reconnection processes  
454 in self-grafted seedlings and found that the vascular reconnection process in  
455 watermelon is different from previous observation in other species. Temperature and  
456 the rootstock cotyledon both have significant effects on the vascular reconnection in  
457 watermelon. The ability of monitoring the phloem and xylem connectivity in individual  
458 plants greatly lowers the workload and enables future studies to investigate the vascular  
459 development process in plants more accurate and efficient.

460

## 461 **Acknowledgements**

462 This research was funded by the National Natural Science Foundation of China  
463 (31972434), National Key Research and Development Program of China  
464 (2019YFD1001900), China Agriculture Research System of MOF and MORA (CARS-  
465 25), Hubei Provincial Natural Science Foundation of China (2019CFA017), and  
466 Huazhong Agricultural University-Agricultural Genomics Institute at Shenzhen,  
467 Chinese Academy of Agricultural Sciences Cooperation Fund (SZYJY2021005).

## 468 **Author contributions**

469 YH, XYW and ZLB devised the project; JNX, XYW, TZ, MX and CJL performed  
470 experimental analyses; JNX, XYW, and YH performed data analyses. YH, XYW and  
471 JNX wrote the manuscript and all authors approved the final text.

## 472 **Declaration of competing interest**

473 All authors declare no interest conflict.

## 474 **References**

- 475 1. Billinton, N., Knight, A.W., 2001. Seeing the wood through the trees: a review of  
476 techniques for distinguishing GFP from endogenous autofluorescence. *Anal.*  
477 *Biochem.* 291, 175-197.
- 478 2. Bond, J., Donaldson, L., Hill, S., Hitchcock, K., 2008. Safranin fluorescent  
479 staining of wood cell walls. *Biotechnic Histochem.* 83, 161-171.
- 480 3. Botha, C.E., Aoki, N., Scofield, G.N., Liu, L., Furbank, R.T., White, R.G., 2008. A  
481 xylem sap retrieval pathway in rice leaf blades: evidence of a role for endocytosis?  
482 *J. Exp. Bot.* 59, 2945-2954.
- 483 4. Cui, Q.Q., Xie, L.L., Dong, C.J., Gao, L.H., Shang, Q.M., 2021. Stage-specific  
484 events in tomato graft formation and the regulatory effects of auxin and cytokinin.  
485 *Plant Sci.* 304, 110803.

- 486 5. Dabirian, S., Miles, C.A., 2017. Increasing survival of splice-grafted watermelon  
487 seedlings using a sucrose application. *HortScience* 52, 579-583.
- 488 6. Deng, Z., Wu, H., Jin, T., Cai, T., Jiang, M., Wang, M., Liang, D., 2021. A sequential  
489 three-phase pathway constitutes tracheary element connection in the  
490 *Arabidopsis/Nicotiana* interfamilial grafts. *Front. Plant Sci.* 12, 664342.
- 491 7. Devi, P., DeVetter, L.W., Lukas, S., Miles, C., 2021. Exogenous treatments to  
492 enhance splice-grafted watermelon survival. *Horticulturae* 7, 197.
- 493 8. Donaldson, L., 2020. Autofluorescence in plants. *Molecules* 25, 2393.
- 494 9. Flaishman, M.A., Loginovsky, K., Golobowich, S., Lev-Yadun, S., 2008.  
495 *Arabidopsis thaliana* as a model system for graft union development in homografts  
496 and heterografts. *J. Plant Growth Regul.* 27, 231-239.
- 497 10. Hassell, R.L., Memmott, F., Liere, D.G., 2008. Grafting methods for watermelon  
498 production. *HortScience* 43, 1677-1679.
- 499 11. Jiang, M., Deng, Z., White, R.G., Jin, T., Liang, D., 2019. Shootward movement of  
500 CFDA tracer loaded in the bottom sink tissues of *Arabidopsis*. *J. Vis. Exp.* e59606
- 501 12. Knoblauch, M., Vendrell, M., de Leau, E., Paterlini, A., Knox, K., Ross-Elliott, T.,  
502 Reinders, A., Brockman, S.A., Ward, J., Oparka, K., 2015. Multispectral phloem-  
503 mobile probes: properties and applications. *Plant Physiol.* 167, 1211-1220.
- 504 13. Knox, K., Paterlini, A., Thomson, S., Oparka, K., 2018. The coumarin glucoside,  
505 esculin, reveals rapid changes in phloem-transport velocity in response to  
506 environmental cues. *Plant Physiol.* 178, 795-807.
- 507 14. Li, H., Wang, F., Chen, X.J., Shi, K., Xia, X.J., Considine, M.J., Yu, J.Q., Zhou,  
508 Y.H., 2014. The sub/supra-optimal temperature-induced inhibition of  
509 photosynthesis and oxidative damage in cucumber leaves are alleviated by grafting  
510 onto figleaf gourd/luffa rootstocks. *Physiol. Plant.* 152, 571-584.
- 511 15. Melnyk, C.W., Schuster, C., Leyser, O., Meyerowitz, E.M., 2015. A developmental  
512 framework for graft formation and vascular reconnection in *Arabidopsis thaliana*.  
513 *Current Biol.* 25, 1-13.
- 514 16. Miao, L., Li, Q., Sun, T.S., Chai, S., Wang, C.L., Bai, L.Q., Sun, M.T., Li, Y.S., Qin,  
515 X., Zhang, Z.H., Yu, X.C., 2021. Sugars promote graft union development in the



- 516 heterograft of cucumber onto pumpkin. *Hortic. Res.* 8, 146.
- 517 17. Nawaz, M.A., Wang, L.M., Jiao, Y.Y., Chen, C., Zhao, L., Mei, M.J., Yu, Y.L., Bie,  
518 Z.L., Huang, Y., 2017. Pumpkin rootstock improves nitrogen use efficiency of  
519 watermelon scion by enhancing nutrient uptake, cytokinin content, and expression  
520 of nitrate reductase genes. *Plant Growth Regul.* 82, 233-246.
- 521 18. Oparka, K.J., Duckett, C.M., Prior, D.A.M., Fisher, D.B., 1994. Realtime imaging  
522 of phloem unloading in the root-tip of *Arabidopsis*. *Plant J.* 6, 759-766.
- 523 19. Thies, J.A., Ariss, J.J., Kousik, C.S., Hassell, R.L., Levi, A., 2016. Resistance to  
524 southern root-knot nematode (*Meloidogyne incognita*) in wild watermelon  
525 (*Citrullus lanatus* var. *citroides*). *J. Nematology.* 48, 14-19.
- 526 20. Tsutsui, H., Yanagisawa, N., Kawakatsu, Y., Ikematsu, S., Sawai, Y., Tabata, R.,  
527 Arata, H., Higashiyama, T., Notaguchi, M., 2020. Micrografting device for testing  
528 systemic signaling in *Arabidopsis*. *Plant J.* 103, 918-929.
- 529 21. Wright, K.M., Oparka, K.J., 1996. The fluorescent probe HPTS as a phloem-mobile,  
530 symplastic tracer: an evaluation using confocal laser scanning microscopy. *J. Exp.*  
531 *Bot.* 47, 439-445.
- 532 22. Yetisir, H., Sari, N., Yucel, S., 2003. Rootstock resistance to *Fusarium* wilt and  
533 effect on watermelon fruit yield and quality. *Phytoparasitica* 31, 163-169.
- 534 23. Yang, Y.J., Lu, X.M., Yan, B., Li, B., Sun, J., Guo, S.R., Tezuka, T., 2013. Bottle  
535 gourd rootstock-grafting affects nitrogen metabolism in NaCl-stressed watermelon  
536 leaves and enhances short-term salt tolerance. *J. Plant Physiol.* 170, 653-661.
- 537 24. Yang, X.P., Hua, X.D., Zhang, M., Xu, J.H., Ren, R.S., Liu, G., Yao, X.F., Chen,  
538 X.H., 2016. Effect of low night temperature on graft union formation in watermelon  
539 grafted onto bottle gourd rootstock. *Sci. Hortic.* 212, 29-34.
- 540 25. Yin, H., Yan, B., Sun, J., Jia, P.F., Zhang, Z.J., Yan, X.S., Chai, J., Ren, Z.Z., Zheng,  
541 G.C., Liu, H., 2012. Graft-union development: a delicate process that involves cell-  
542 cell communication between scion and stock for local auxin accumulation. *J. Exp.*  
543 *Bot.* 63, 4219-4232.
- 544 26. Zhong, Y.Q., Chen, C., Nawaz, M.A., Jiao, Y.Y., Zheng, Z.H., Shi, X.F., Xie, W.Y.,  
545 Yu, Y.G., Guo, J., Zhu, S.H., Xie, M., Kong, Q.S., Cheng, F., Bie, Z.L., Huang, Y.,

546 2018. Using rootstock to increase watermelon fruit yield and quality at low  
547 potassium supply: A comprehensive analysis from agronomic, physiological and  
548 transcriptional perspective. *Sci. Hortic.* 241, 144-151.

549

550

551

552

553

554

555

556

557

558

559

560

561

562

563

564

565

566

567

568

569

570

571

572

573

574

575
